# Supplementary material for: Isomerization of two-dimensional non-fullerene electron acceptor materials for developing high-performance organic solar cells
Source: Royal Society of Chemistry journal article supplement (doi:10.1039/d2tc02373c), 2022-01-01
Supplement: d2tc02373c1.pdf [file d2tc02373c1.pdf]

## Supporting Information

### Isomerization of Two-Dimensional Non-Fullerene Electron Acceptor Materials for Developing High-Performance Organic Solar Cells

*Yezi Yang, Chuang Yao, Lei Li, Maolin Bo, Meng He, and Jinshan Wang*

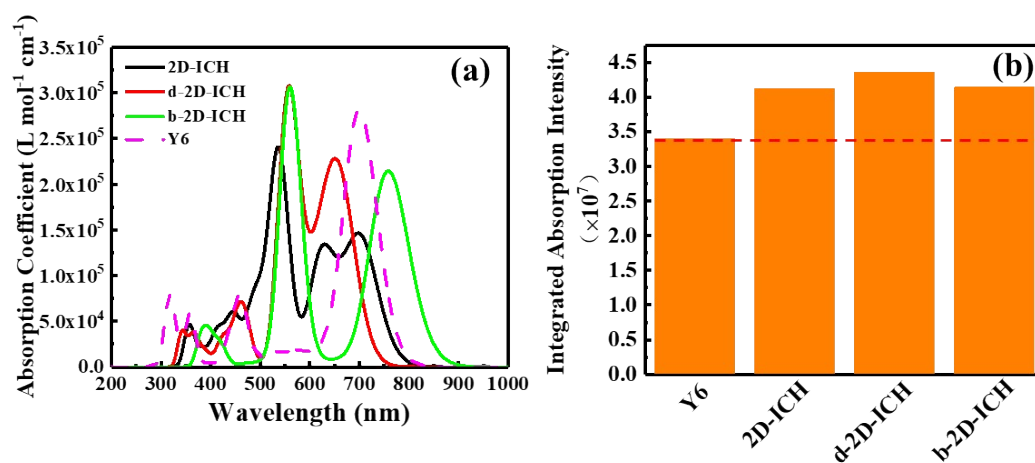

**Figure S1.** TDDFT calculated absorption spectra (a) and integrated absorption intensity (b) of Y6, **2D-ICH**, **d-2D-ICH** and **b-2D-ICH** in chloroform based on PBE0/def2-SVPD.

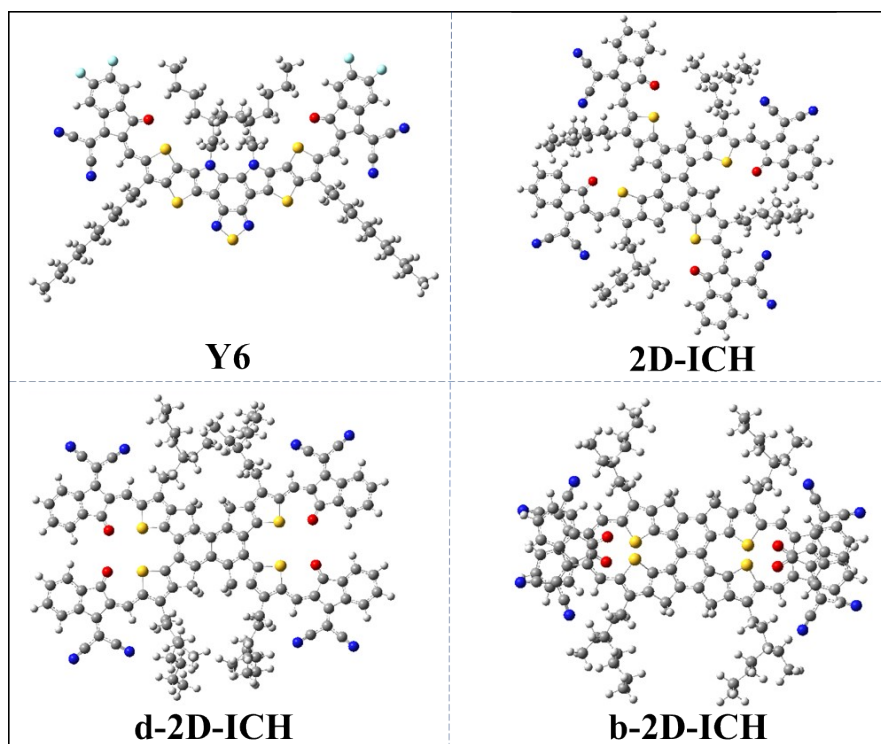

**Figure S2.** Molecular structures of Y6, 2D-ICH, d-2D-ICH and b-2D-ICH linked with four 4-ethyloctane as side chain.

**Table S1.** Molecular surface descriptors (Area,  $\sigma^2_+$  and  $\sigma^2_-$ ) of Y6, 2D-ICH, d-2D-ICH and b-2D-ICH used to predict the solubility.

|          | Area<br>(Å <sup>2</sup> ) | $\sigma^2_+$<br>(kcal/mol) <sup>2</sup> | $\sigma^2_-$<br>(kcal/mol) <sup>2</sup> |
|----------|---------------------------|-----------------------------------------|-----------------------------------------|
| Y6       | 1436.10                   | 31.35                                   | 60.39                                   |
| 2D-ICH   | 1722.35                   | 34.60                                   | 73.27                                   |
| d-2D-ICH | 1764.93                   | 51.85                                   | 87.21                                   |
| b-2D-ICH | 1618.45                   | 47.55                                   | 79.39                                   |
